# Supplementary material for: Preparation of amphiphilic copolymers via base-catalyzed hydrolysis of quaternized poly[2-(dimethylamino)ethyl methacrylate]
Source: Royal Society of Chemistry journal article supplement (doi:10.1039/d1py01697k), 2022-01-01
Supplement: d1py01697k1.pdf [file d1py01697k1.pdf]

# Preparation of amphiphilic copolymers via base-catalyzed hydrolysis of quaternized poly[2-(dimethylamino)ethyl methacrylate]

Vladislav Y. Shevtsov, Ting-Yi Hsin, and Yeong-Tarng Shieh\*

Department of Chemical and Materials Engineering,  
National University of Kaohsiung,  
Kaohsiung 81148, Taiwan

## Supporting Information

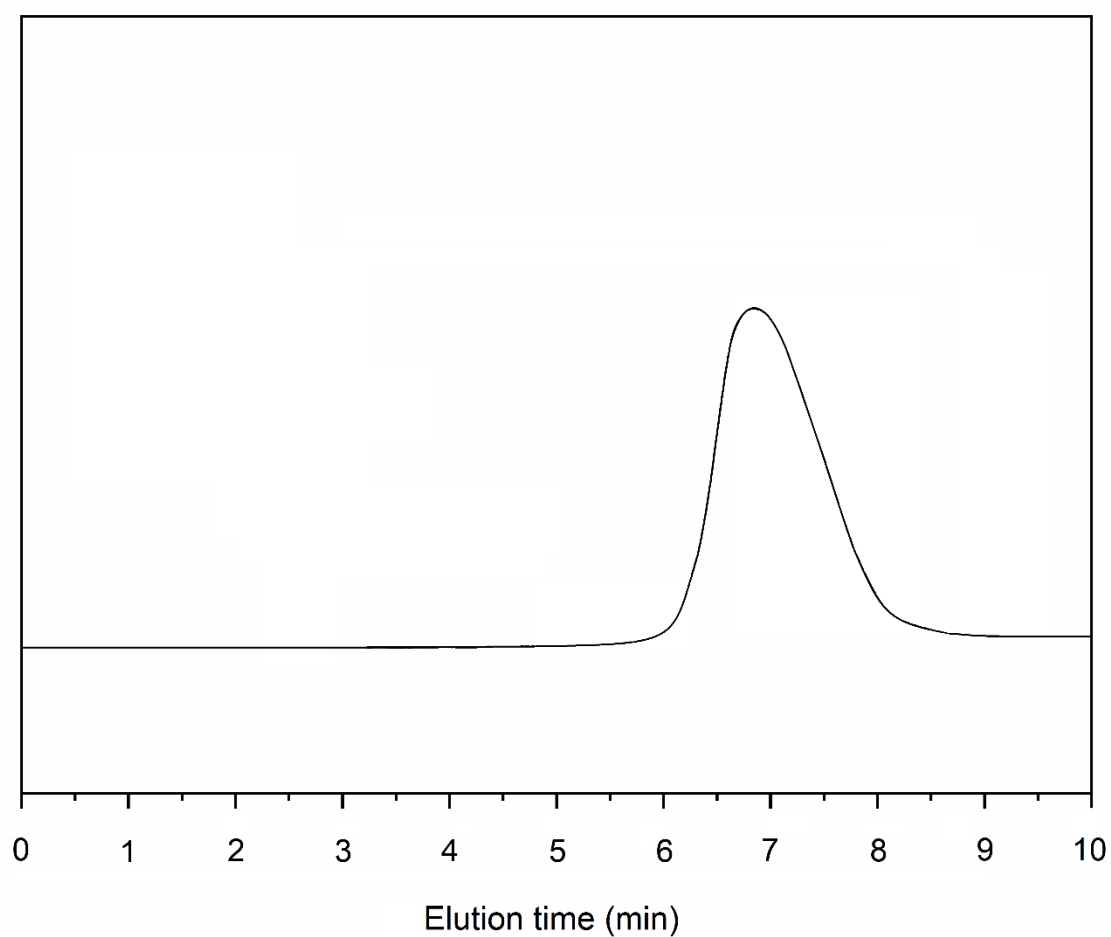

**Figure S1.** GPC curve of PDMAEMA prepared by ATRP.

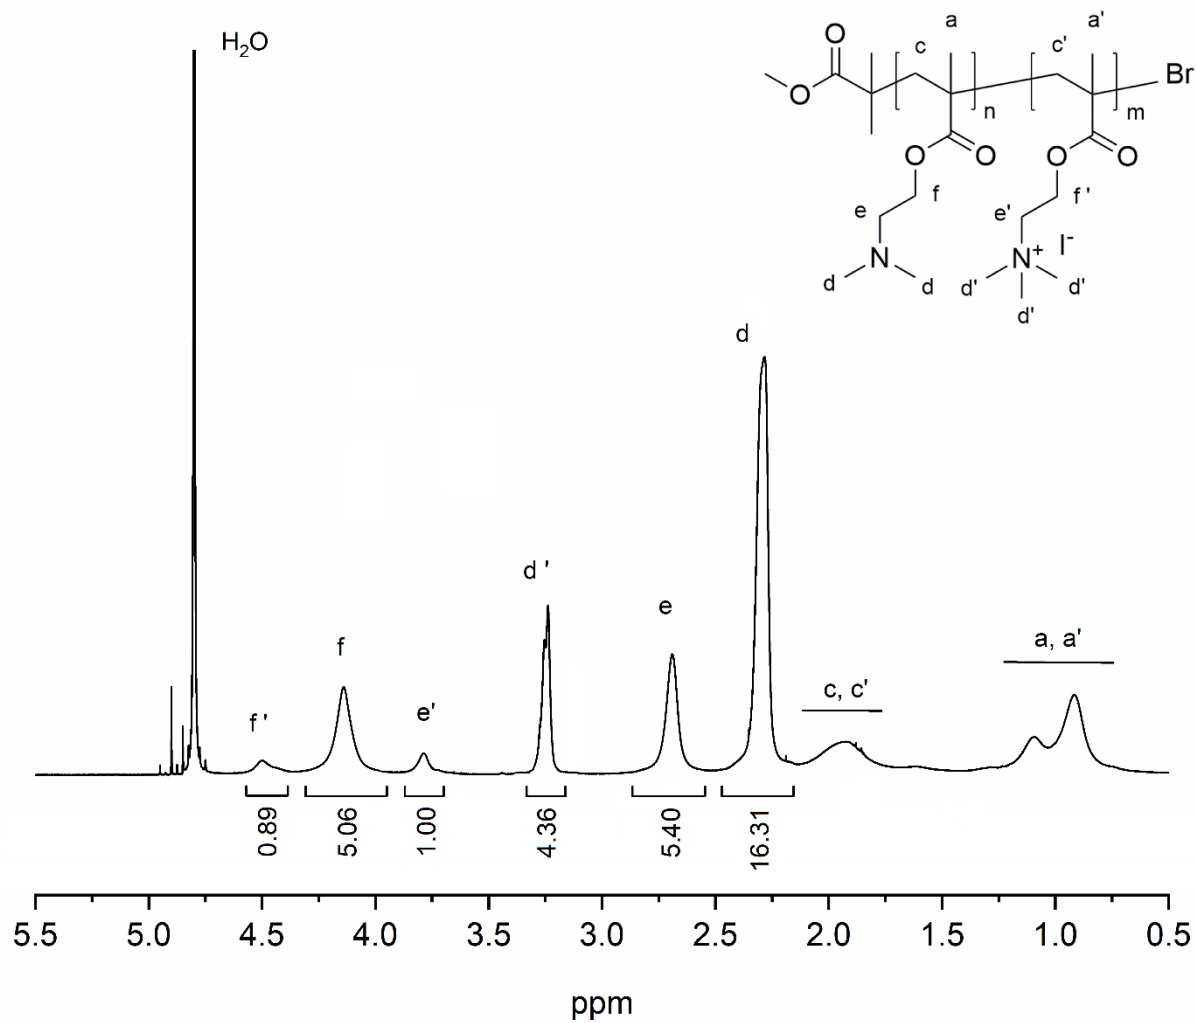

**Figure S2.**  $^1\text{H}$  NMR spectrum of  $q_{15}\text{PDMAEMA}$  in  $\text{D}_2\text{O}$ .

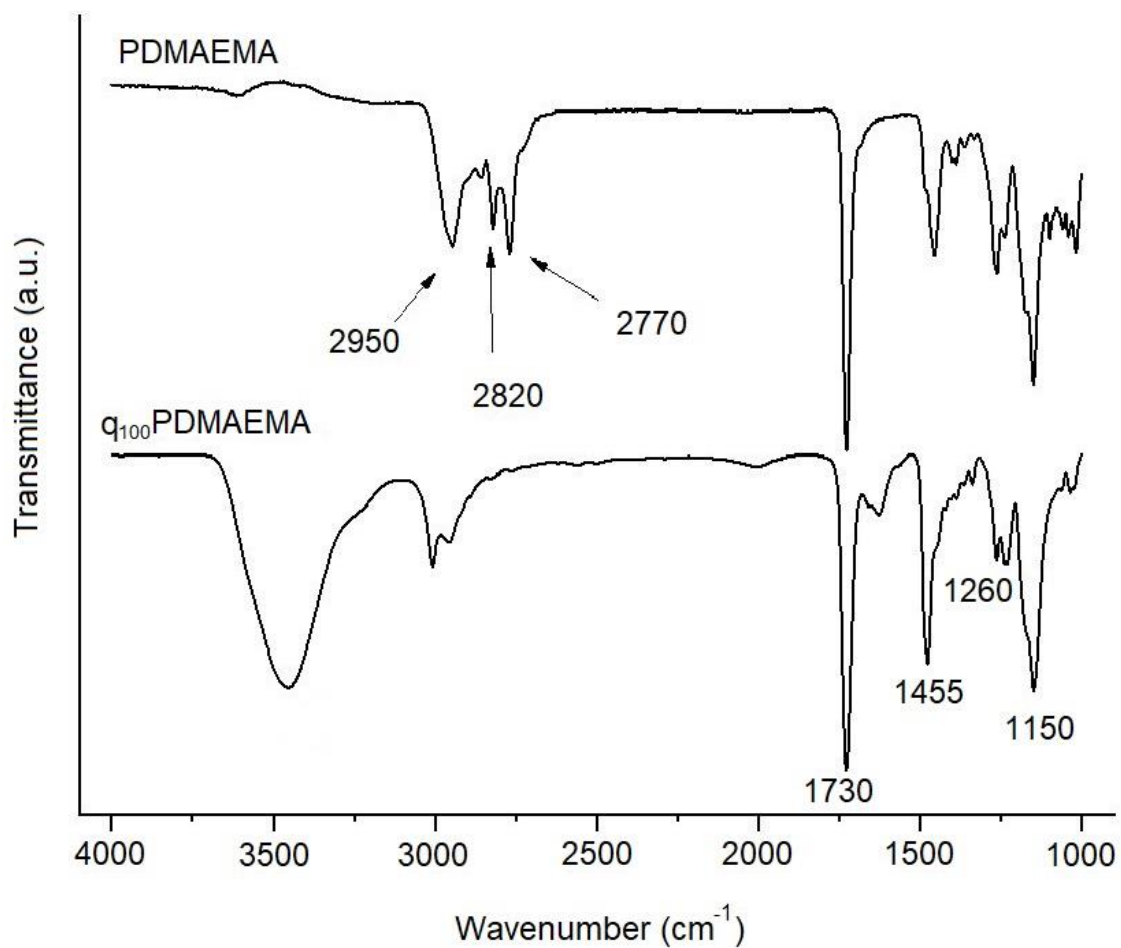

**Figure S3.** FT-IR spectra of pristine PDMAEMA and q<sub>100</sub>PDMAEMA.

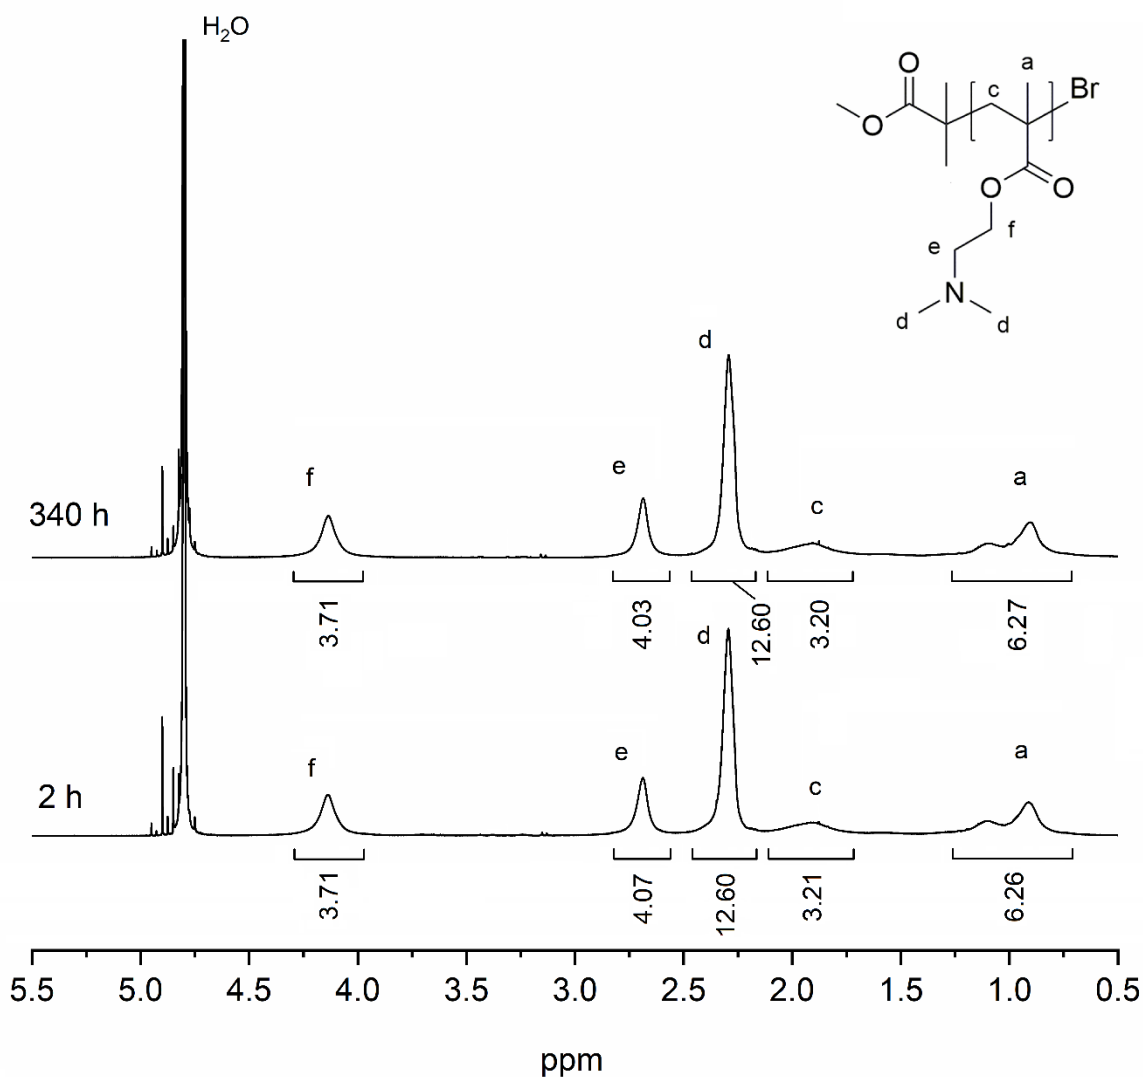

**Figure S4.**  $^1\text{H}$  NMR spectra of pristine PDMAEMA after being dissolved in 0.25 M NaOD solution for 2 h and 340 h at 25 °C.

**Table S1.** Results of  $^1\text{H}$  NMR peaks' integration of q<sub>50</sub>PDMAEMA spectra in Fig. 2 for (A) 2 h, (B) 10 h, (C) 25 h, (D) 50 h, and (E) 340 h.

| Areas under peaks calculated via intergration |      |      |      |      |      |       |      |
|-----------------------------------------------|------|------|------|------|------|-------|------|
| Spectra                                       | f'   | f    | j    | e'   | i    | d'    | h    |
| A                                             | 2.64 | 3.08 | 0.32 | 2.55 | 0.31 | 12.50 | 1.54 |
| B                                             | 2.41 | 3.09 | 0.55 | 2.34 | 0.59 | 11.20 | 2.72 |
| C                                             | 2.07 | 3.07 | 0.89 | 2.10 | 0.87 | 9.80  | 4.13 |
| D                                             | 1.86 | 3.08 | 1.11 | 1.80 | 1.07 | 8.75  | 5.57 |
| E                                             | 1.34 | 3.05 | 1.62 | 1.30 | 1.57 | 6.37  | 7.68 |

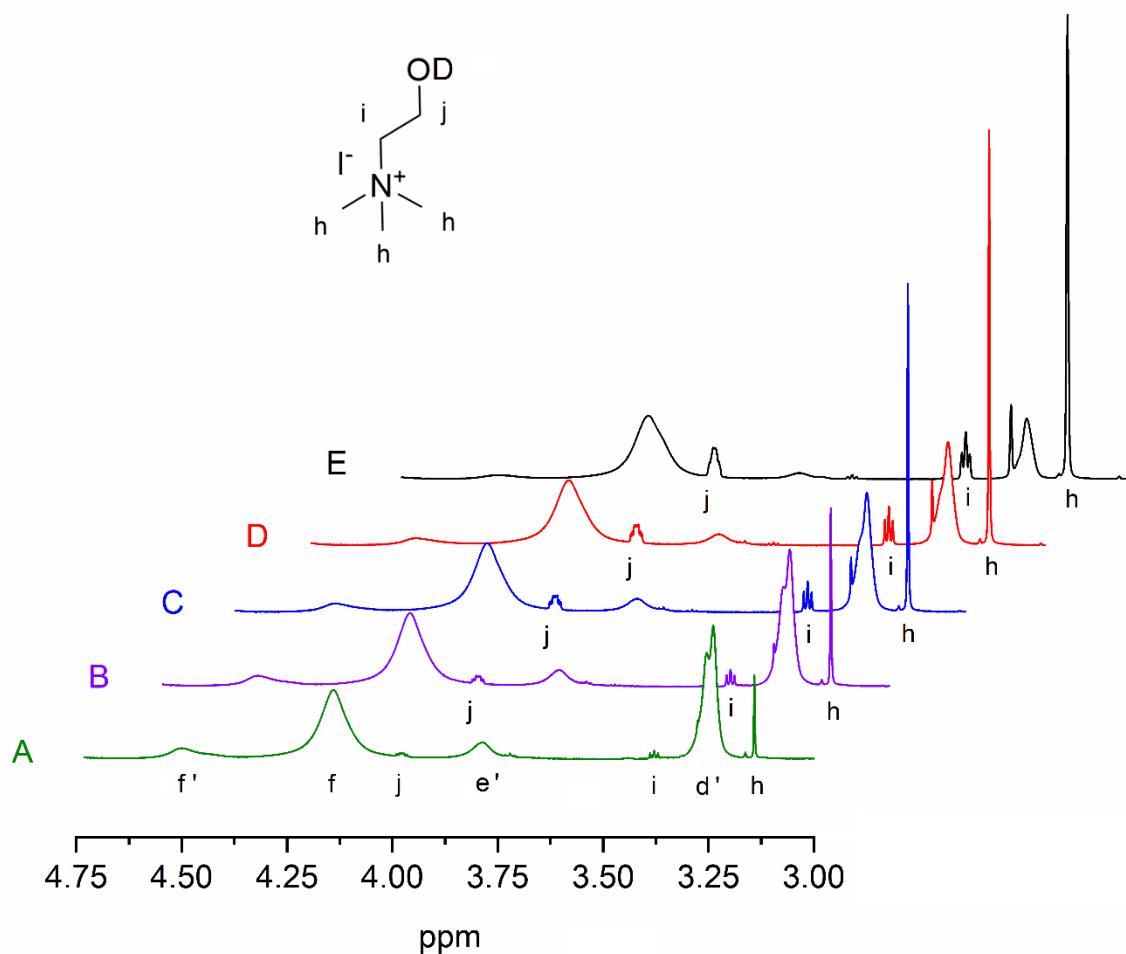

**Figure S5.**  $^1\text{H}$  NMR spectra of  $q_{15}\text{PDMAEMA}$  dissolved in 0.25 M NaOD solution for (A) 2 h, (B) 10 h, (C) 25 h, (D) 50 h, and (E) 340 h at 25 °C. Peaks integrations are displayed in Table S2.

**Table S2.** Results of  $^1\text{H}$  NMR peaks' integrations of  $q_{15}\text{PDMAEMA}$  spectra in Fig. S5 for (A) 2 h, (B) 10 h, (C) 25 h, (D) 50 h, and (E) 340 h.

| Areas under peaks calculated via intergration |      |      |      |      |      |      |      |
|-----------------------------------------------|------|------|------|------|------|------|------|
| Spectra                                       | f'   | f    | j    | e'   | i    | d'   | h    |
| A                                             | 1.46 | 9.83 | 0.29 | 1.49 | 0.28 | 7.03 | 0.86 |
| B                                             | 1.33 | 9.87 | 0.42 | 1.33 | 0.43 | 6.02 | 1.86 |
| C                                             | 1.18 | 9.84 | 0.57 | 1.22 | 0.55 | 5.59 | 2.30 |
| D                                             | 1.07 | 9.83 | 0.68 | 1.03 | 0.73 | 4.68 | 3.20 |
| E                                             | 0.58 | 9.85 | 1.17 | 0.60 | 1.17 | 2.59 | 5.29 |

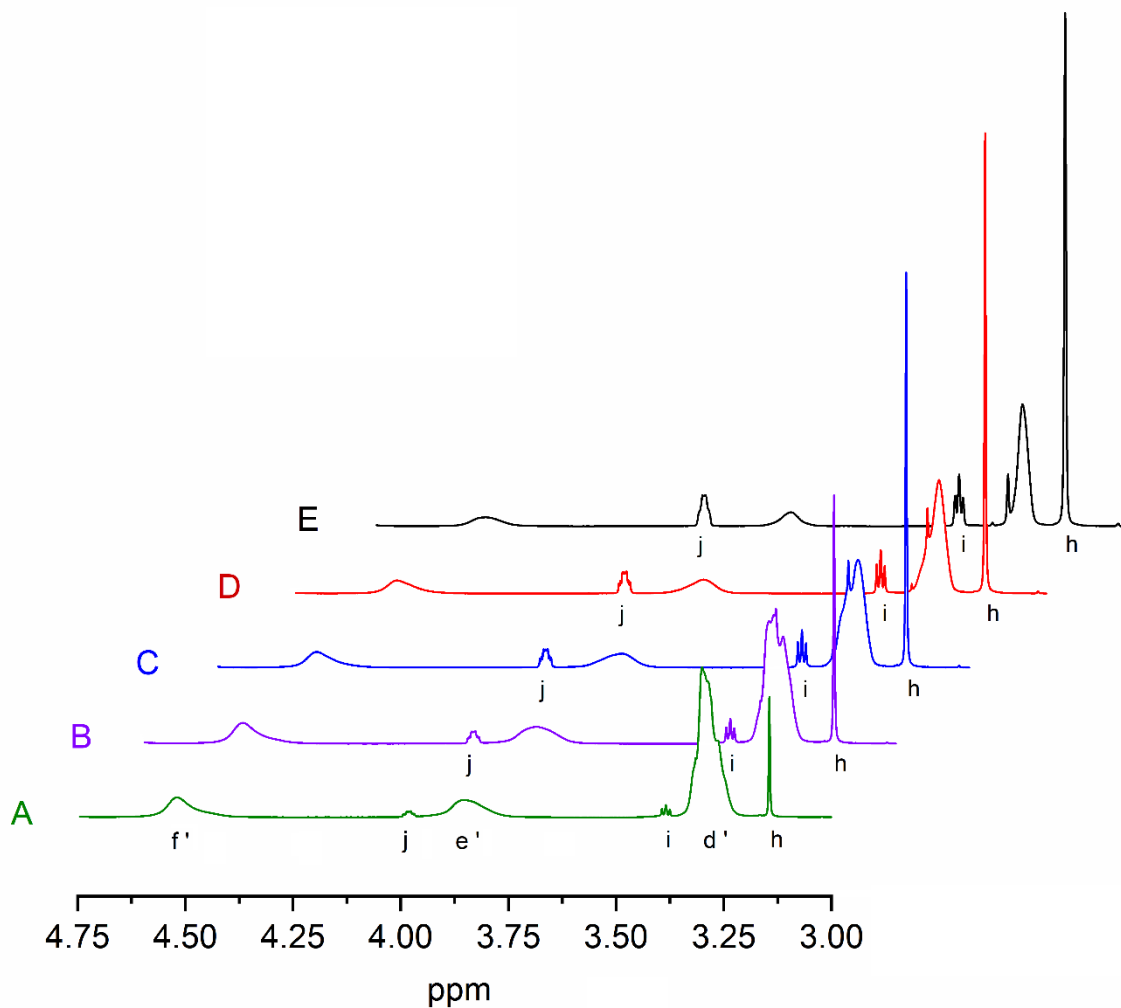

**Figure S6.**  $^1\text{H}$  NMR spectra of  $q_{100}\text{PDMAEMA}$  dissolved in 0.25 M NaOD solution for (A) 2 h, (B) 10 h, (C) 25 h, (D) 50 h, and (E) 340 h at 25 °C. Peaks integrations are displayed in Table S3.

**Table S3.** Results of  $^1\text{H}$  NMR peaks' integrations of  $q_{100}\text{PDMAEMA}$  spectra in Fig. S6 for (A) 2 h, (B) 10 h, (C) 25 h, (D) 50 h, and (E) 340 h.

| Spectra | Areas under peaks calculated via intergration |      |      |      |       |      |
|---------|-----------------------------------------------|------|------|------|-------|------|
|         | f'                                            | j    | e'   | i    | d'    | h    |
| A       | 3.84                                          | 0.36 | 3.66 | 0.34 | 18.98 | 1.72 |
| B       | 3.56                                          | 0.64 | 3.40 | 0.60 | 17.53 | 3.17 |
| C       | 3.17                                          | 1.03 | 3.04 | 0.96 | 15.61 | 5.09 |
| D       | 2.92                                          | 1.28 | 2.80 | 1.20 | 14.28 | 6.42 |
| E       | 2.22                                          | 1.98 | 2.12 | 1.88 | 10.87 | 9.83 |

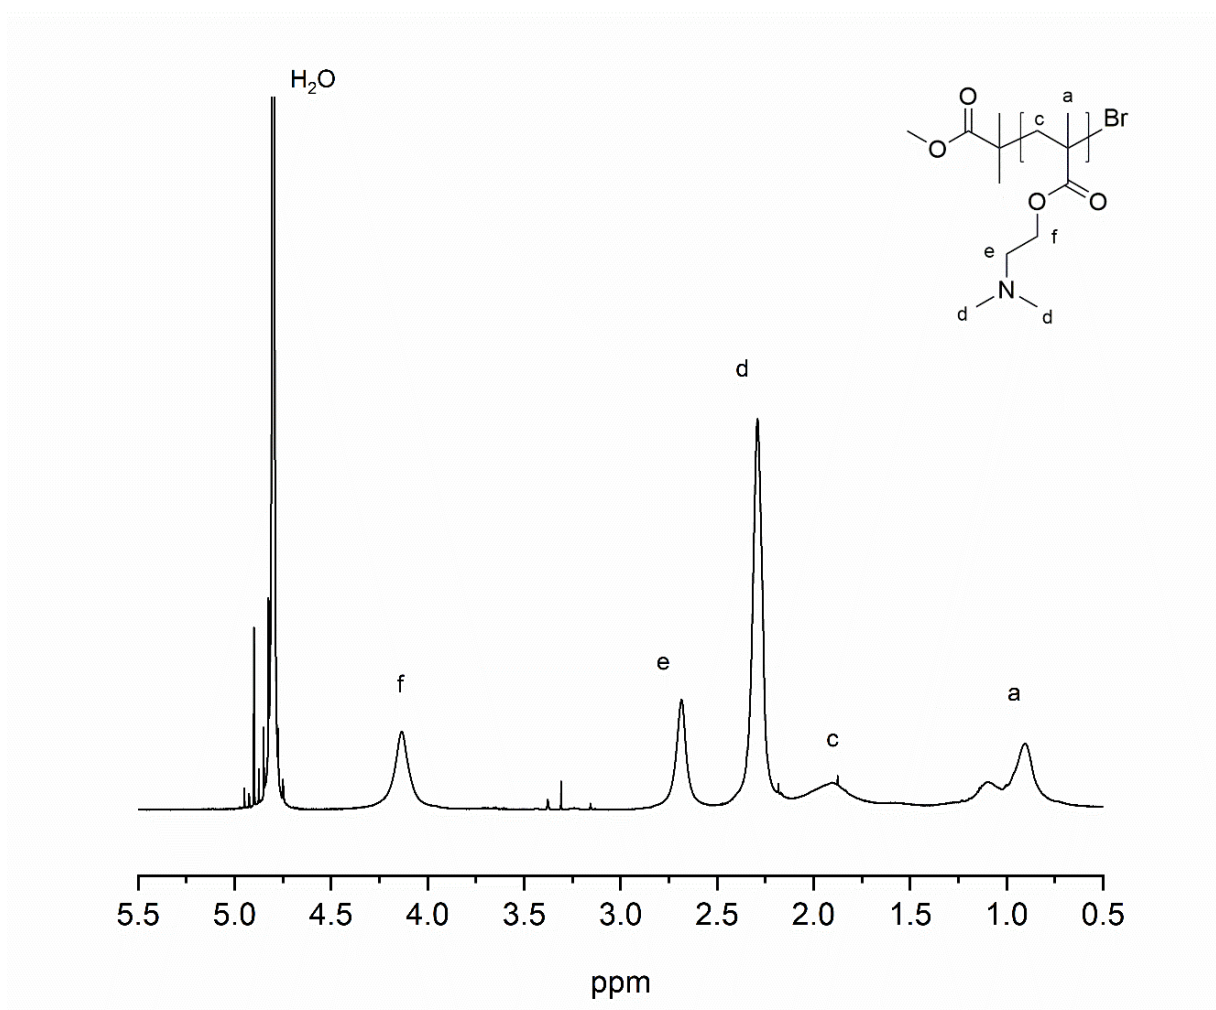

**Figure S7.** <sup>1</sup>H NMR spectrum of pristine PDMAEMA (in D<sub>2</sub>O) after being dissolved in 1 M NaOH solution for 5 days at 25 °C.

Fig. S7 displays the <sup>1</sup>H NMR spectrum of PDMAEMA that was left to hydrolyze for 5 days in 1 M NaOH aqueous solution. It was anticipated that PDMAEMA would at least to a small degree decompose into PMAA and (dimethylamino)ethanol DMAE small molecules. To be able to detect DMAE, precautions were taken to avoid the loss of this side product, namely, after hydrolysis alkali was neutralized using aqueous HCl solution and then the mixture was placed directly in a drying oven set to 60 °C.

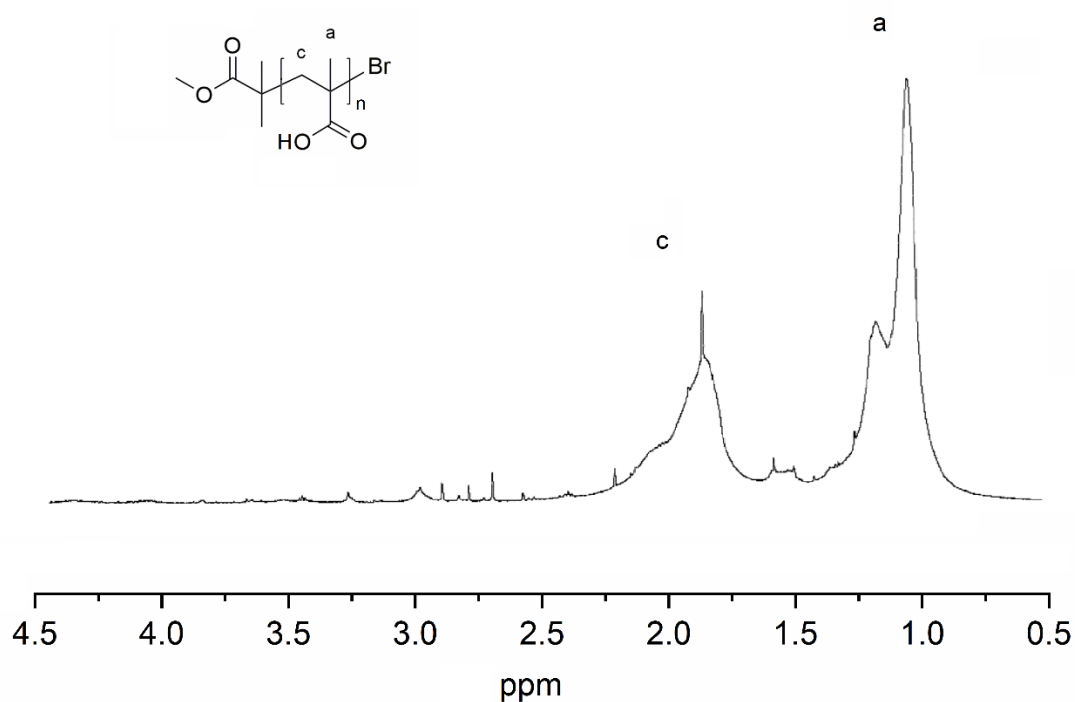

**Figure S8.**  $^1\text{H}$  NMR spectrum of  $q_{100}\text{PDMAEMA}$  (in  $\text{D}_2\text{O}$ ) after being dissolved in 1 M NaOH solution for 5 days at 25 °C.

Fig. S8 shows the  $^1\text{H}$  NMR spectrum of  $q_{100}\text{PDMAEMA}$  that was left to hydrolyze under the same conditions as pure PDMAEMA (5 days, 1 M NaOH aqueous solution). In order to avoid confusion, it was reasonable to analyze the chemical structure of the resulting polymer alone. So, to do that, after hydrolysis, this sample was purified by aqueous dialysis using a membrane bag to ensure the removal of choline iodide (small molecule byproduct).



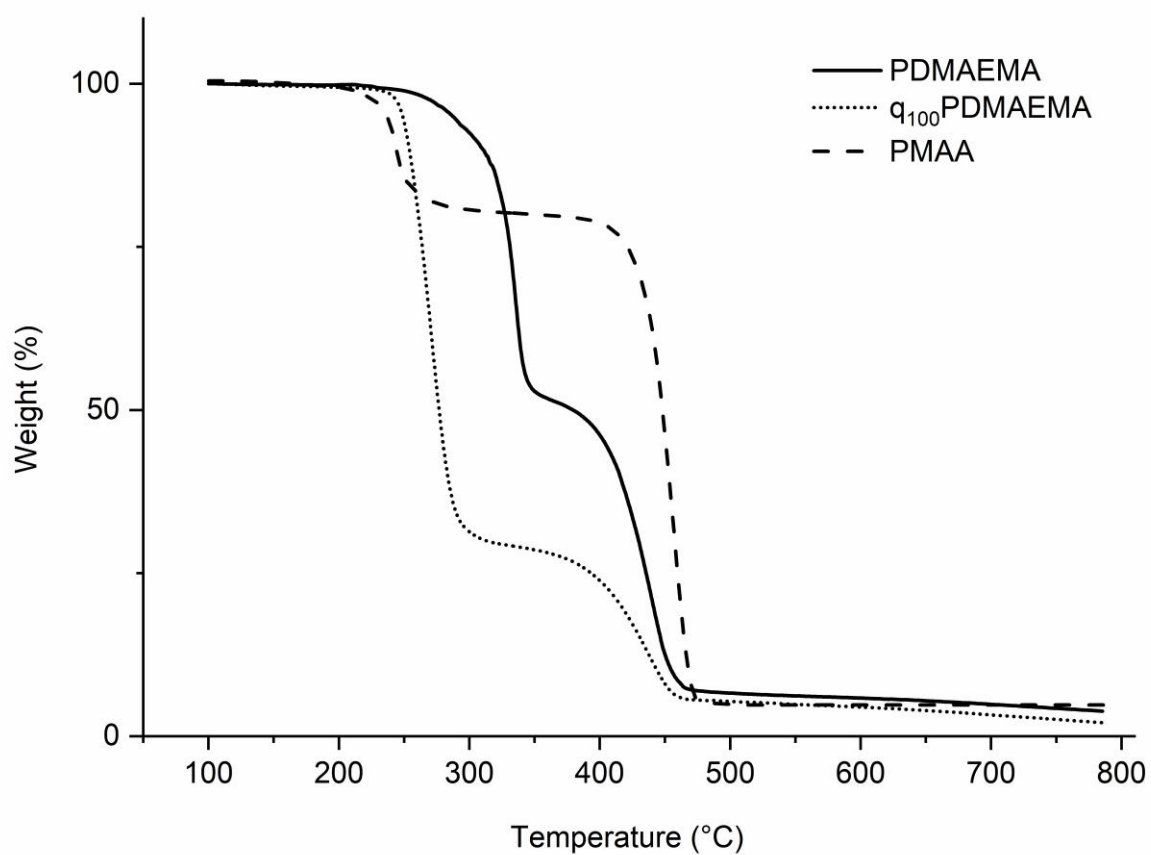

**Figure S9.** TGA curves of pristine PDMAEMA, q<sub>100</sub>PDMAEMA, and PMAA (obtained by hydrolysis of q<sub>100</sub>PDMAEMA).

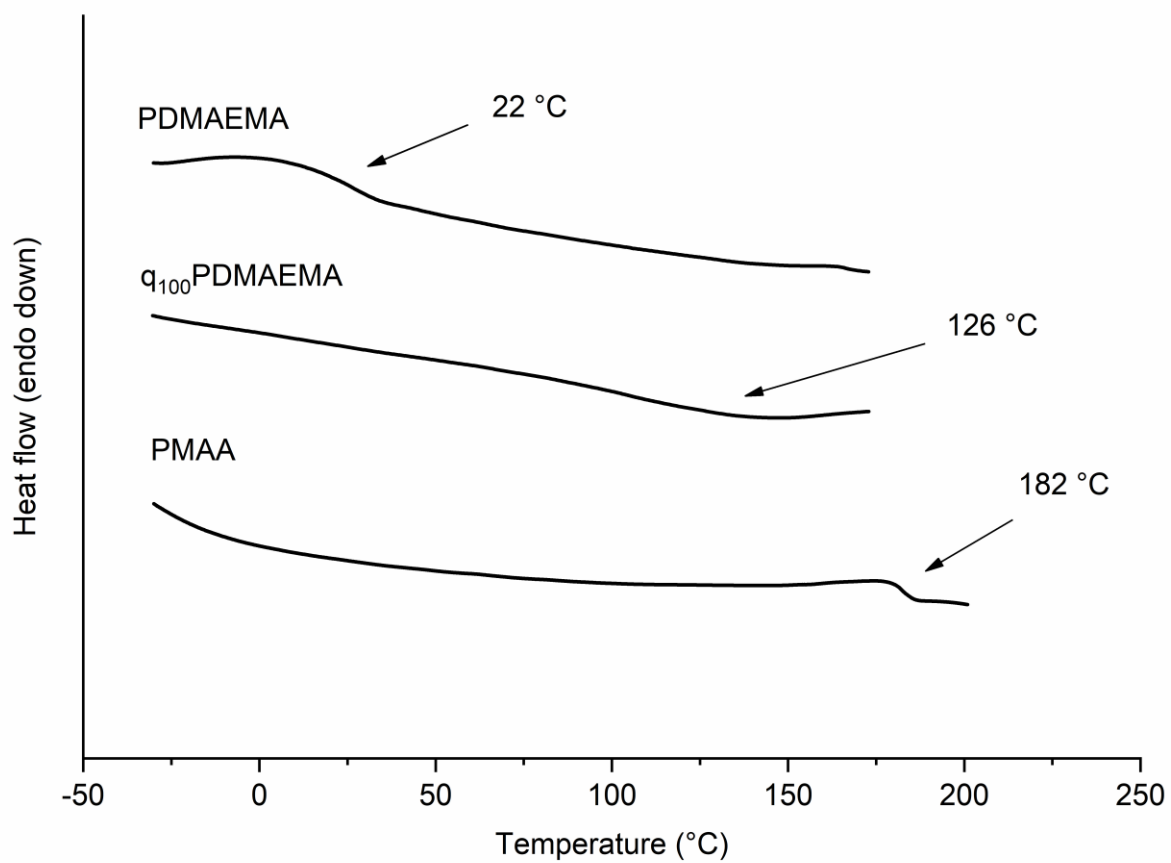

**Figure S10.** DSC curves of pristine PDMAEMA, q<sub>100</sub>PDMAEMA, and PMAA (obtained by hydrolysis of q<sub>100</sub>PDMAEMA).
